# Supplementary material
Source: Springer Nature journal article supplement (https://www.springermedizin.de/resource/supplementary/12882_2013_924_MOESM9_ESM.pdf/9454040)

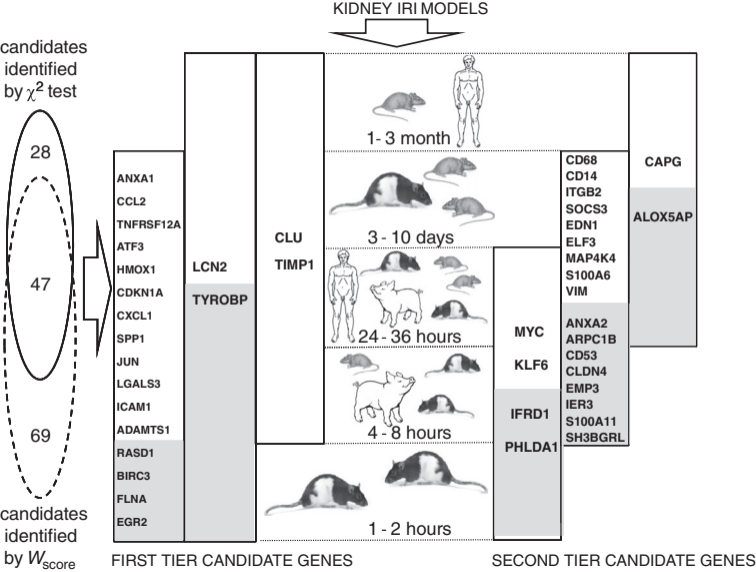

Supplement: MOESM9 [file 9454040]
